# Supplementary material
Source: PubMed Central journal article supplement (PMC3180807)
Supplement: supp_tpc.111.085480_Supplemental_data.pdf [file supp_tpc.111.085480_Supplemental_data.pdf]

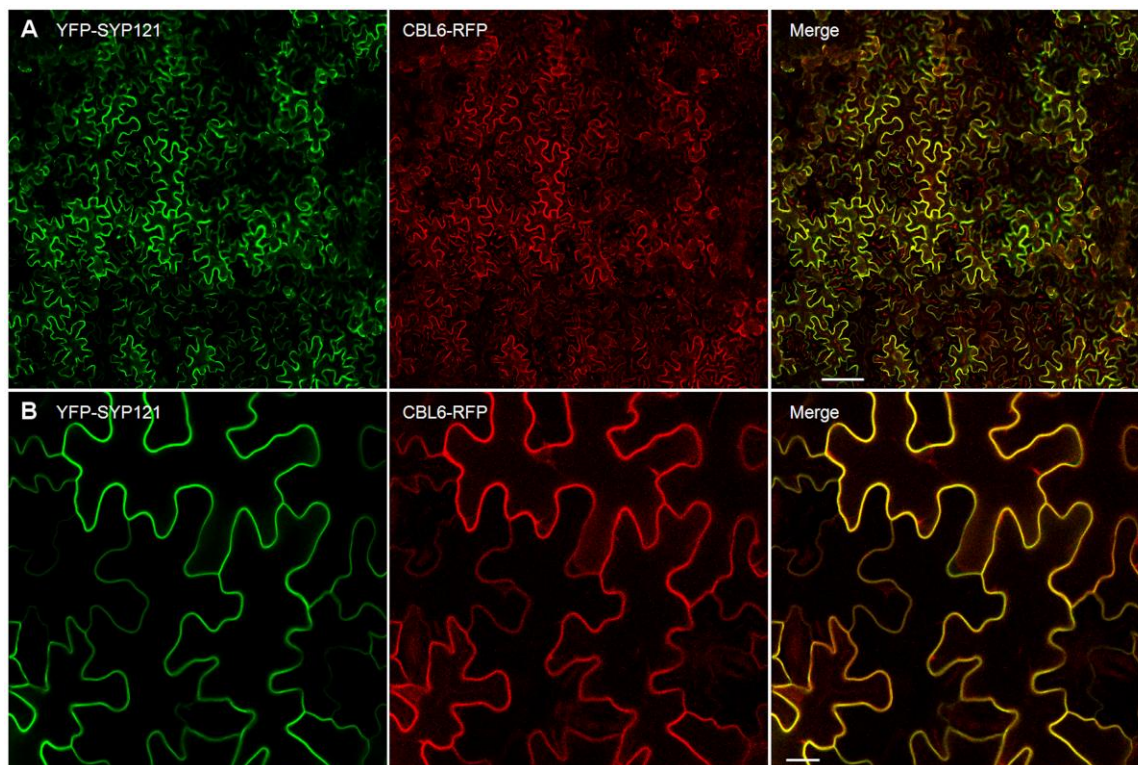

**Supplemental figure 1: Co-transformation efficiency of two different genes from a single T-DNA region.** Tobacco leaf infiltration with an *Agrobacterium* strain harbouring pRainbow yielding YFP-labelled plasma membrane (green) and RFP-labelled tonoplast (red) on the same T-DNA. **A)** Low magnification image illustrating the high correlation between the two fluorophors in a large number of cells. The scale bar represents 100 microns. **B)** High magnification image demonstrating red and green signals at the cell periphery that are strictly correlated with respect to intensity. The scale bar represents 20 microns.

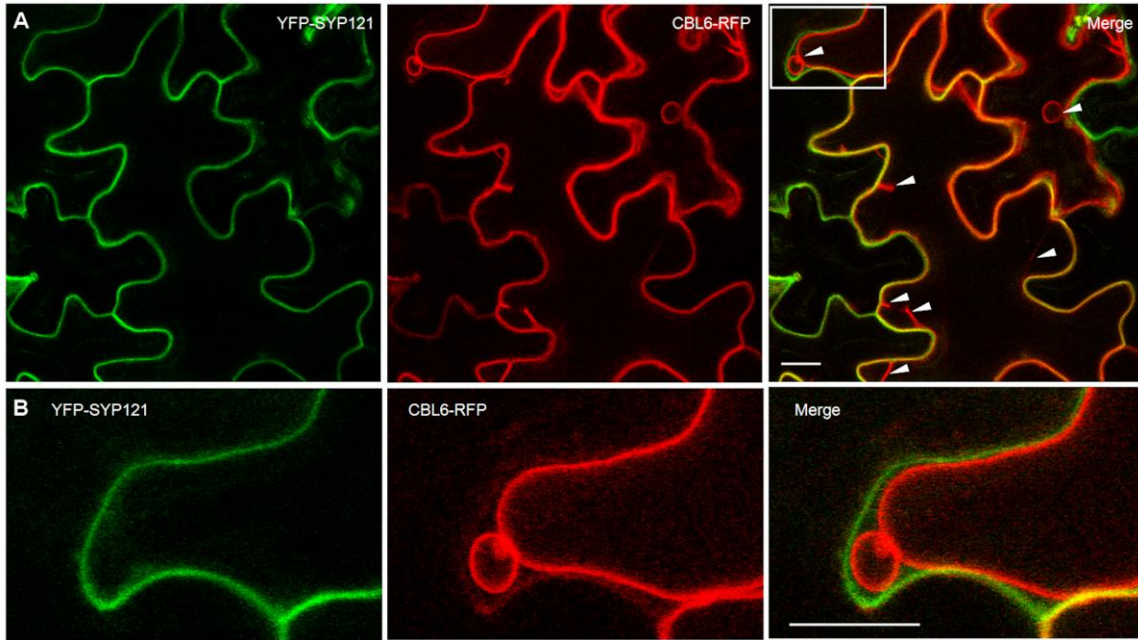

**Supplemental figure 2: Separation of plasma membrane from tonoplast.** Tobacco leaf epidermis cells were co-infiltrated with an *Agrobacterium* strain harbouring the plasma membrane marker YFP-SYP121 (green) and another strain harbouring CBL6-RFP (red). **A)** Low magnification image illustrating that both markers label the cell periphery but CBL6-RFP labels additional transvacuolar strands and wraps around the nucleus (white arrows), as opposed to YFP-SYP121, which does not label transvacuolar strands and strictly leaves the nucleus inside the cell. The box in the Merged image (right) is the magnified regions shown below. **B)** High magnification inset from panel A (white box), illustrating clear separation of YFP-SYP121-labelled plasma membrane from the CBL6-RFP-labelled tonoplast. The scale bars represent 20 microns in both A) and B).

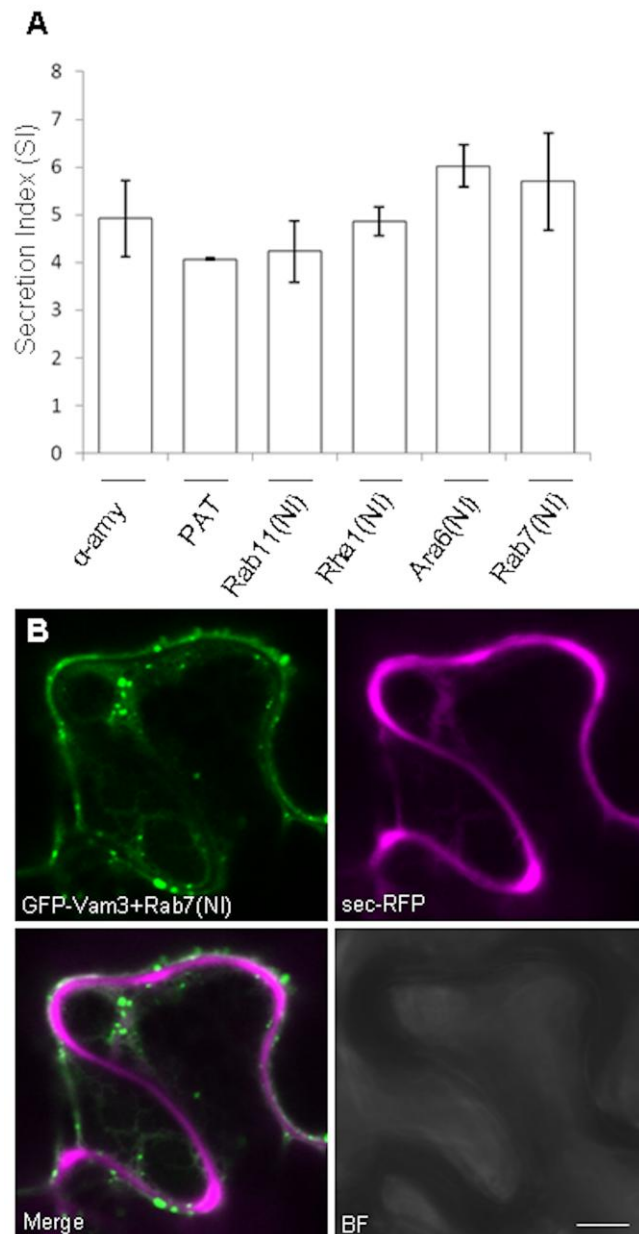

**Supplemental figure 3: Rab NI mutants do not impair constitutive secretion. (A)**

Constant amounts (15  $\mu$ g) of  $\alpha$ -amylase encoding-plasmid were electroporated with constant amounts (30  $\mu$ g) of PAT, Rab11(NI), Rha1(NI), Ara6(NI) or Rab7(NI) dual expression vectors. None of the mutants affected the transport of the secretory cargo  $\alpha$ -amy. **(B)** An Agrobacterium strain harbouring a dual expression vector encoding GFP-Vam3 and Rab7(NI) was co-infiltrated with a sec-RFP strain. Integrity of the secretory route is maintained under conditions in which Rab7(NI) induces the formation of TGN-PVC GFP-Vam3 clusters. No accumulation of sec-RFP in the clusters was observed and normal apoplastic accumulation is evident when comparing with the bright-field image (BF). Scale bar is 10  $\mu$ m.

Supplemental figure 4:  
Schematic drawings of recombinant genes used in this study

Single expression constructs

|     |                  |       |                         |
|-----|------------------|-------|-------------------------|
| 35S | Amy-spo          | 3'nos | Pimpl et al., 2003      |
| 35S | Aleu-amy         | 3'nos | This study              |
| 35S | Amy-chi          | 3'nos | This study              |
| 35S | Amy-BN2SA        | 3'nos | This study              |
| 35S | $\alpha$ -Amy    | 3'nos | Phillipson et al., 2001 |
| 35S | secRFP           | 3'nos | This study              |
| 35S | Aleu-RFP         | 3'nos | Foresti et al., 2010    |
| 35S | RFP-chi          | 3'nos | This study              |
| 35S | GFP-Vam3         | 3'nos | Foresti et al., 2006    |
| 35S | CBL6-RFP         | 3'nos | This study              |
| 35S | $\alpha$ TIP-YFP | 3'nos | Hunter et al., 2007     |

Dual expression constructs This study

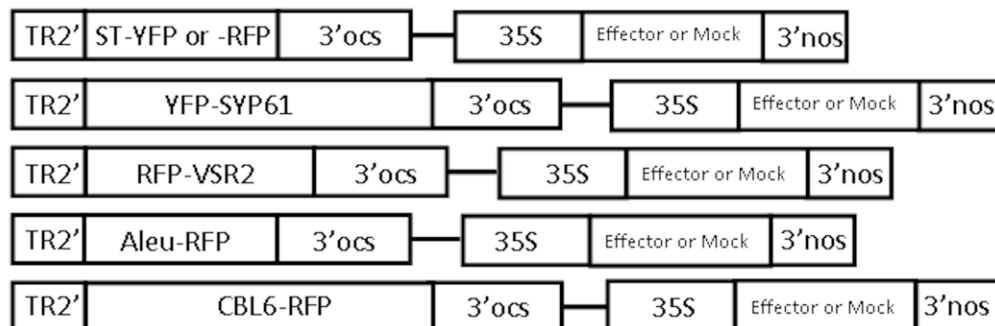

## Supplemental figure 5: Oligonucleotides used in this study

## A) Primers to generate vacuolar cargo

|                     |                                                                                                                                      |
|---------------------|--------------------------------------------------------------------------------------------------------------------------------------|
| Chitinase           | NtChis 5'-GATCGGACTTCTTGTTGATACTATGTAAT-3'<br>NtChias 5'-CTAGATTACATAGTATCAACAAGAAGTCC-3'                                            |
| BN2SA               | BN2SAs 5'-GATCTCTCCAATGAGATGTCCAATGGGTGGATCTATTGCTGGTTTTTAAT-3'<br>BN2SAas 5'-CTAGATTA AAAACCAGCAATAGATCCACCCATTGGACATCTCATTGGAGA-3' |
| Amy                 | Amys 5'-CCAGCTTGGCTAGCGGGCAAGTCCTCTTTTCAGGGCTTCAACTG-3'<br>3'nosas 5'-ATAATTGCGGGACTCTAATCA-3'                                       |
| RFP-chitinase       | 35Ss 5'-CCACTATCCTTCGCAAGA-3'<br>RFPchias 5'-TTAGCCTCTAGAGTTACATAGTATCAACAAGAAGTCCGATCTCGGAACCT<br>TCTGCTCCGG-3'                     |
| CBL6<br>(At4g16350) | CBL6s 5'-TTTTGGGATCGATGATGATGCAATGTTTAGATGG-3'<br>CBL6as 5'-CACATCCCGCTAGCTCCATCCAGCTCACTAGGAGTG-3'                                  |

## B) cDNA cloning oligonucleotides

|                      |                                                                                                        |
|----------------------|--------------------------------------------------------------------------------------------------------|
| Rab6<br>(At2g44610)  | Rab6s 5'-TTGAGAAACCATGGCTCCGGTCTCGGCACTCGC-3'<br>Rab6as 5'-GTTGTTGTCTAGAAATCTAACAAGAGCATCCTC-3'        |
| Rab8<br>(At5g03502)  | Rab8s 5'-TCTGACCATGGCGGT TCGCGCCGGCAAGAGC-3'<br>Rab8as 5'-CAATCAGGATCCTAAACGTAACACTACAGCAAGCTG-3'      |
| Rab11<br>(At1g09630) | Rab11s 5'-AGTGTAACCATGGCGAGAAGACCGGACGAAG-3'<br>Rab11as 5'-AACACAAACGGATCCTTTCAAGACGATGAGCAACAAGG-3'   |
| Rha1<br>(At5g45130)  | Rha1s 5'-TCAGTCAACCATGGCTAGCTCTGGAAACAAGAAC-3'<br>Rha1as 5'-CTCTTCAGTCTAGAATCTAAGCACAACACGATGAACTC-3'  |
| Ara6<br>(At3g54840)  | Ara6s 5'-GGGGTAAGCCATGGGATGTGCTTCTTCTTCCAG-3'<br>Ara6as 5'-TGATTCAACTCTAGAATCATGACGAAGGAGCAGGACGAGG-3' |
| Rab7<br>(At3g16100)  | Rab7s 5'-GGATCGCCATGGGTTCTTCTCGCCGGAGAGTTCTTC-3'<br>Rab7as 5'-AAACTTTTTCTAGATTAGCATTACACCCTGTTGA-3'    |

## Supplemental figure 5: Oligonucleotides used in this study Cont.

### C) Mutagenesis oligonucleotides

|           |                                                                                                                                          |
|-----------|------------------------------------------------------------------------------------------------------------------------------------------|
| Rab6(NI)  | Rab6(NI) <sub>s</sub> 5'-TAGTCGTGCTTGTGGGAATCAAAACTGATCTAGTGGA-3'<br>Rab6(NI) <sub>as</sub> 5'-TCCACTAGATCAGTTTTGATTCCCAACAAGCACGACTA-3' |
| Rab8(NI)  | Rab8(NI) <sub>s</sub> 5'-CAAAATATTGGTTGGTATCAAAGCTGATATGGATG-3'<br>Rab8(NI) <sub>as</sub> 5'-CATCCATATCAGCTTTGATACCAACCAATATTTTG-3'      |
| Rab11(NI) | Rab11(NI) <sub>s</sub> 5'-ATGCTTCAGATCTGTCTTGATCCCAATCAACATGAT-3'<br>Rab11(NI) <sub>as</sub> 5'-ATCATGTTGATTGGGATCAAGACAGATCTGAAGCAT-3'  |
| Rha1(NI)  | Rha1(NI) <sub>s</sub> 5'-TGGCTCTTGCTGGAATCAAAGCTGATTTATT-3'<br>Rha1(NI) <sub>as</sub> 5'-AATAAATCAGCTTTGATTCCAGCAAGAGCCA-3'              |
| Ara6(NI)  | Ara6(NI) <sub>s</sub> 5'-TGGCTCTGGTTGGTATCAAAGCTGATCTACA-3'<br>Ara6(NI) <sub>as</sub> 5'-TGTAGATCAGCTTTGATACCAACCAGAGCCA-3'              |
| Rab7(NI)  | Rab7(NI) <sub>s</sub> 5'-TTGTTGTGTTGGGATCAAGACTGATGTTGA-3'<br>Rab7(NI) <sub>as</sub> 5'-TCAACATCAGTCTTGATCCCAACACAACAA-3'                |

### D) Primers to generate the dual expression vector

|        |                                                                                                                                           |
|--------|-------------------------------------------------------------------------------------------------------------------------------------------|
| TR2    | TR2EcoRIs 5'-GCCAGTGAATTCGAGCTCGGTACCCGGCCTGAATTTCCGGGG-3'<br>TR2Y <sub>as</sub> 5'-CTTCAAGTTGGTATGAATCATCGATTTGGTGTATCGAGATTGGTTATG-3'   |
| ST-YFP | TR2Y <sub>s</sub> 5'-CATAACCAATCTCGATACACCAAATCGATGATTCATACCAACTGAAG-3'<br>STY <sub>as</sub> 5'-AGCAGGACTCTAGACTACTTGTACAGCTCGTCCATGCC-3' |
| 3'ocs  | 3ocsXba1s 5'-CTGTACAAGTAGTCTAGAGTCCCTGCTTTAATGAGATATGC-3'<br>3ocs35sas 5'-TTGATGAGACCTGCTGCGTAGGAGCTTGCATGCCCTGCAGGTCT-3'                 |
| 35S    | 3ocs35ss 5'-AGGACCTGCAGGCATGCAAGCTCCTACGCAGCAGGTCTCATCAA-3'<br>amyas 5'-GAAGTTGTACCACCCGCCATTGTGCTTCC-3'                                  |
